# Supplementary material
Source: PubMed Central journal article supplement (PMC6300627)
Supplement: cc0e9868040b80f4db8a8eddaf954b22_IAI.00939-17-s0001.pdf [file cc0e9868040b80f4db8a8eddaf954b22_IAI.00939-17-s0001.pdf]

## Supplementary Information

### Supp. Fig. 1

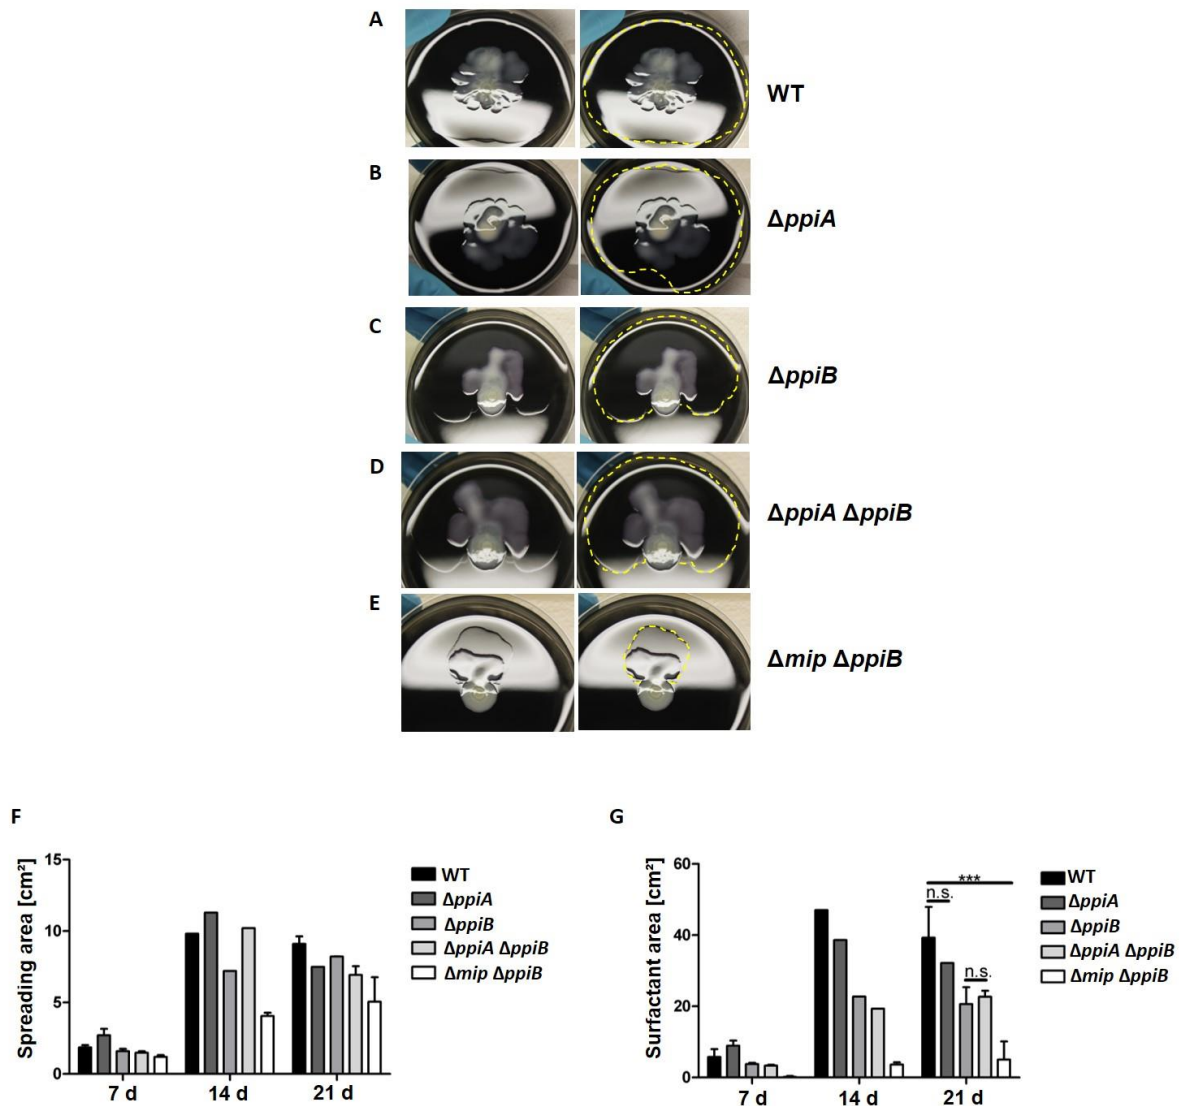

**Supp. Fig. 1: PpiA has no influence on sliding motility of *L. pneumophila*.** When grown on BCYE medium with 0.5 % (w/v) agar for 21 d at 30 °C no difference in the size of the surfactant film could be observed between the wild type strain (**A**) and its isogenic *ppiA*-deficient mutant (**B**). The  $\Delta ppiB$  (**C**) and the  $\Delta ppiA \Delta ppiB$  double mutant (**D**) produced comparably less surfactant, while there was no significant difference between both strains. The  $\Delta mip \Delta ppiB$  double mutant (**E**) produced a significantly smaller surfactant film. (**F**) The spreading area over the 21 d was not significantly different between the strains. (**G**) Quantitative evaluation of the surfactant area of wild the *L. pneumophila* and its PPIase mutants. Shown are mean and standard deviations of three independent experiments. Statistical significance was calculated using unpaired Student's *t*-test (\*\* $p \leq 0.001$ , n.s.=not significant).

Supp. Fig. 2

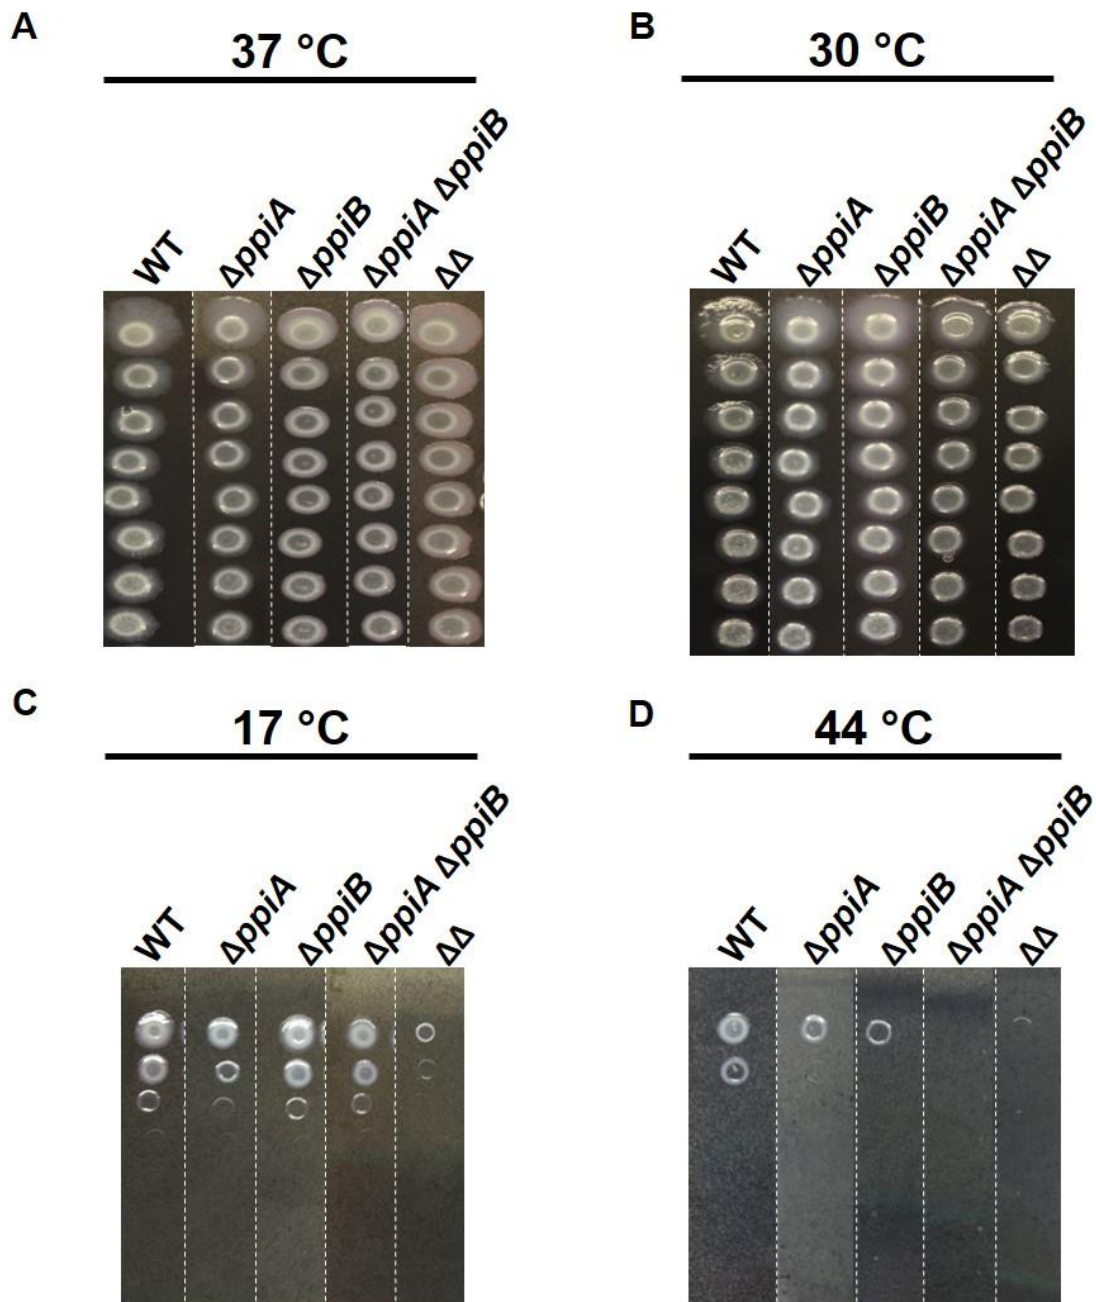

**Supp. Fig. 2: Growth of different the *L. pneumophila* PpiA-negative mutant at suboptimal temperatures.** No growth defect could be observed in the PpiA-deficient mutant at (A) 37 °C, (B) 30 °C or (C) 17 °C. (D) The mutant lacking both PpiA and PpiB was affected by heat stress similar to the Mip and PpiB deficient double mutant ( $\Delta\Delta$ ). Representative sections of bacterial plates of three separate experiments are shown and aligned for a better comparison of the strains. Single sections originating from different plates are separated by white dashed lines.

### Supp. Fig. 3

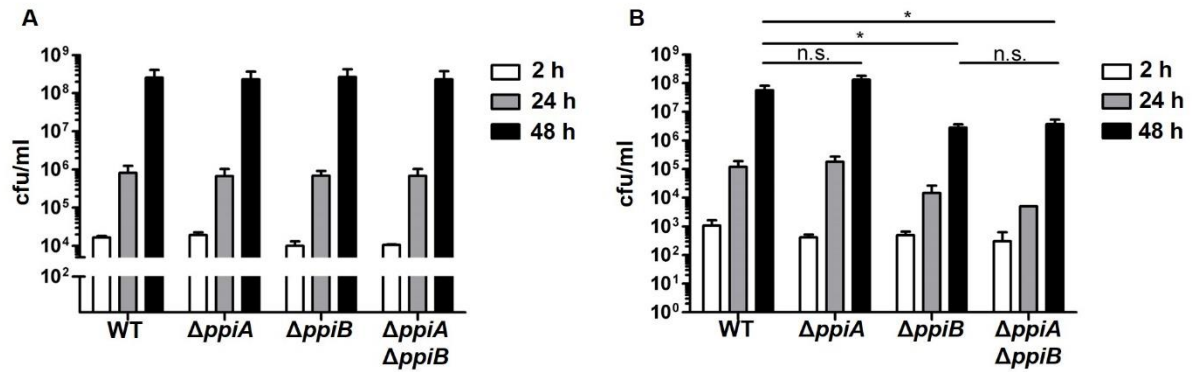

**Supp. Fig. 3: PpiA has no influence on intracellular replication in *A. castellanii* or human macrophage-like THP-1 cells.** (A) When *A. castellanii* was infected with wild type *L. pneumophila* Corby or its isogenic *ppiA* or *ppiB* single or double deletion mutants no significant differences could be observed in the outcome of the infections. (B) In THP-1 cells the  $\Delta ppiB$  mutant is attenuated as it reaches significantly lower cfu counts in 48 h. In contrast, the  $\Delta ppiA$  mutant reveals no significant difference compared to wild type. Similarly, the intracellular replication of the  $\Delta ppiB$  and the  $\Delta ppiA \Delta ppiB$  double mutant do not significantly differ. Shown are the mean and standard deviations of three independent experiments performed in duplicates. Statistical significance was calculated using unpaired Student's *t*-test (\* $p \leq 0.05$ , n.s.=not significant).
